# Supplementary material for: Oxidized starch as a superior binder for silicon anodes in lithium-ion batteries
Source: Royal Society of Chemistry journal article supplement (doi:10.1039/c6ra20560g), 2016-01-01
Supplement: c6ra20560g1.pdf [file c6ra20560g1.pdf]

## Supplemental Information

### **Oxidized Starch as a Superior Binder for Silicon Anodes in Lithium-ion Batteries**

Yitian Bie<sup>a</sup>, Jun Yang<sup>a</sup>, Yanna Nuli<sup>a</sup>, Jiulin Wang<sup>a</sup>

*<sup>a</sup> Shanghai Electrochemical Energy Devices Research Centre, School of Chemistry and  
Chemical Engineering, Shanghai Jiao Tong University, Shanghai, 200240, China*

*Corresponding author: J. Yang, [yangj723@sjtu.edu.cn](mailto:yangj723@sjtu.edu.cn)*

## **Experimental**

### *Preparation of electrodes*

Silicon nanoparticles (50-200 nm, Alfa-Aesar), Super P (40nm, Timical) and binders were mixed in a 6:2:2 weight ratio in water. After stirred for 5 h, the slurry was coated on a Cu foil current then further dried at 70 °C in vacuum for 8 h. The foil was cut to  $\Phi$ 12 mm sheets to assemble cells. CMC was purchased from Aladdin and SA from Aldrich. OS was purchased from Dongguan Dongmei Starch Co. Ltd. For OS, polymer was firstly dissolved in water at 75 °C for 5 min before adding silicon nanoparticles and Super P.

### *Cells assembling and electrochemical tests*

The electrochemical performances of the as-prepared anodes were tested via CR2016 coin cells with ENTEK ET20-26 as separator, and pure lithium foil as counter electrode. The cells were assembled in an argon-filled glove box (MB-10 compact, MBraun) using 1M  $\text{LiPF}_6/\text{EC}+\text{DMC}$  (1:1 by volume, ethylene carbonate (EC), dimethyl carbonate (DMC)) as electrolyte, including 10% Fluoroethylene carbonate (FEC). The cycling performances were evaluated on a LAND battery test system (Wuhan Kingnuo Electronics Co., Ltd., China) at 25 °C constant current densities with the cut-off voltage of 0.1/1.2 V vs Li/Li<sup>+</sup>. The specific capacity was calculated on the basis of the weight of silicon nanoparticles in electrodes.

### *Morphology and structure characterization*

The SEM images of the electrodes were observed by a FEI Nova SEM 230 ultra-high resolution FESEM. The Fourier transform infrared (FTIR) spectrum of the sample was recorded on a FTIR spectrometer (Bruker VECTOR22). To evaluate the binder strength of electrode film, an electrode sample in 20 mm width and 100 mm length was attached to 3M

tape (12mm wide), and the peeling strength of the electrode specimens was measured with a high-precision micromechanical test system (FMT-310A5, Alluris).

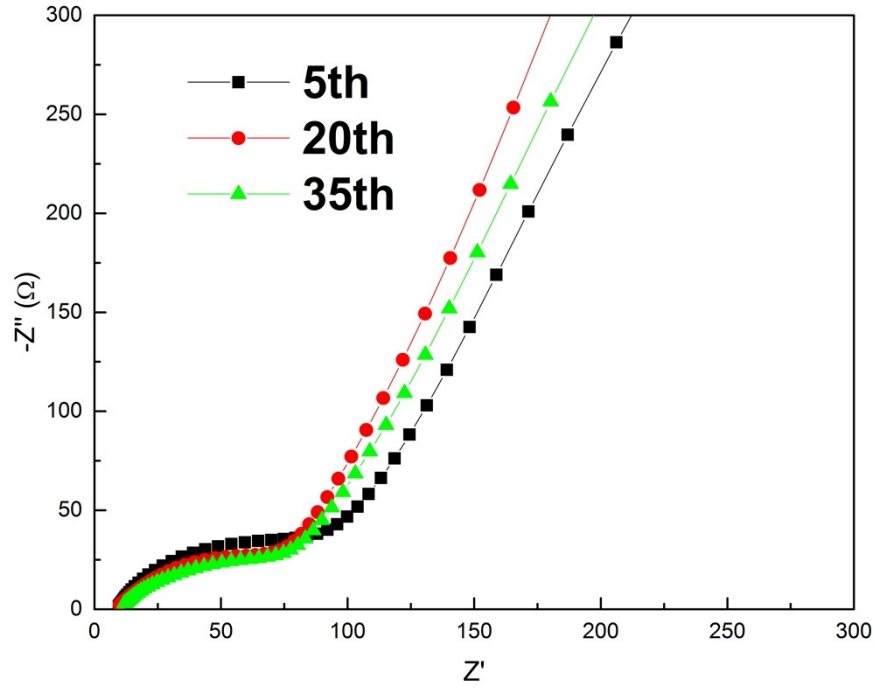

Figure S1 Nyquist plots of OS electrode after 5, 20 and 35 cycles with  $0.5 \text{ A g}^{-1}$  lithiation and  $2.0 \text{ A g}^{-1}$  delithiation.

Table S1 Comparison of the electrochemical performances for Si electrodes with different binders. (Si is short for commercial silicon nanoparticles)

| Type of binder        | Electrode composition             | Active materials loading            | Electrode performance                                                                                     | Areal capacity                        | Ref.     |
|-----------------------|-----------------------------------|-------------------------------------|-----------------------------------------------------------------------------------------------------------|---------------------------------------|----------|
| OS                    | 60Si:20Super P:20binder           | $0.8 \text{ mg cm}^{-2}$            | $1904 \text{ mA h g}^{-1}$ @ $0.5 \text{ A g}^{-1}$ lithiation + $2 \text{ A g}^{-1}$ delithiation, 120th | $1.52 \text{ mA h cm}^{-2}$           | Our work |
| $\text{Ca}^{2+}$ + SA | 53Si-C:18carbon black:29binder    | Unknown                             | $1822 \text{ mA h g}^{-1}$ @ $0.42 \text{ A g}^{-1}$ , 120th                                              | unknown                               | 1        |
| Self-healing binder   | 50SiMP:6.5carbon black:43.5binder | $0.5\text{-}0.7 \text{ mg cm}^{-2}$ | $\sim 2000 \text{ mA h g}^{-1}$ @ $0.4 \text{ A g}^{-1}$ , 100th                                          | $1.0\text{-}1.4 \text{ mA h cm}^{-2}$ | 2        |
| NaPAA-g-CMC           | 60Si:20Super P:20binder           | $0.45 \text{ mg cm}^{-2}$           | $1816 \text{ mA h g}^{-1}$ , 100th                                                                        | $0.817 \text{ mA h cm}^{-2}$          | 3        |
| Gum arabic            | 50Si:25Super C65:25binder         | $0.3 \text{ mg cm}^{-2}$            | $\sim 2500 \text{ mA h g}^{-1}$ @ $0.4 \text{ A g}^{-1}$ , 100th                                          | $0.75 \text{ mA h cm}^{-2}$           | 4        |
| Pectin                | 60Si:20Super P:20binder           | $1 \text{ mg cm}^{-2}$              | $\sim 1500 \text{ mA h g}^{-1}$ @ $3 \text{ A g}^{-1}$ , 100th                                            | $1.5 \text{ mA h cm}^{-2}$            | 5        |

|                                             |                                     |                         |                                                                     |                                   |              |
|---------------------------------------------|-------------------------------------|-------------------------|---------------------------------------------------------------------|-----------------------------------|--------------|
| Guar gum                                    | 52Si:18conductive additive:29binder | 1.1 mg cm <sup>-2</sup> | ~2000 mA g <sup>-1</sup> @ 0.84 A g <sup>-1</sup> , 30th            | 2.2 mA h cm <sup>-2</sup> , 30th  | <sup>6</sup> |
| PAA/pullulan                                | 60Si:20carbon black:20binder        | 0.6 mg cm <sup>-2</sup> | ~1600 mA g <sup>-1</sup> @ 0.2C lithiation+0.5C delithiation, 100th | 0.96 mA h cm <sup>-2</sup>        | <sup>7</sup> |
| Xanthan Gum                                 | 60Si:20Super P:20binder             | 0.9 mg cm <sup>-2</sup> | ~1600 mA g <sup>-1</sup> @ 3.5A g <sup>-1</sup> , 12th              | 1.44 mA h cm <sup>-2</sup> , 12th | <sup>8</sup> |
| hyperbranched $\beta$ -cyclodextrin polymer | 60Si:20Super P:20binder             | 0.8 mg cm <sup>-2</sup> | ~1500 mA g <sup>-1</sup> @1.5 A g <sup>-1</sup> , 120th             | 1.2 mA h cm <sup>-2</sup>         | <sup>9</sup> |

## REFERENCES

1. J. Liu, Q. Zhang, Z.-Y. Wu, J.-H. Wu, J.-T. Li, L. Huang and S.-G. Sun, *Chem Commun*, 2014, **50**, 6386.
2. C. Wang, H. Wu, Z. Chen, M. T. McDowell, Y. Cui and Z. A. Bao, *Nat Chem*, 2013, **5**, 1042-1048.
3. L. Wei, C. Chen, Z. Hou and H. Wei, *Sci Rep*, 2016, **6**, 19583.
4. M. Ling, Y. N. Xu, H. Zhao, X. X. Gu, J. X. Qiu, S. Li, M. Y. Wu, X. Y. Song, C. Yan, G. Liu and S. Q. Zhang, *Nano Energy*, 2015, **12**, 178-185.
5. D. E. Yoon, C. Hwang, N. R. Kang, U. Lee, D. Ahn, J. Y. Kim and H. K. Song, *ACS Appl Mater Interfaces*, 2016, **8**, 4042-4047.
6. J. Liu, Q. Zhang, T. Zhang, J.-T. Li, L. Huang and S.-G. Sun, *Adv Funct Mater*, 2015, **25**, 3599-3605.
7. C. Hwang, S. Joo, N. R. Kang, U. Lee, T. H. Kim, Y. Jeon, J. Kim, Y. J. Kim, J. Y. Kim, S. K. Kwak and H. K. Song, *Sci Rep-Uk*, 2015, **5**.
8. Y. K. Jeong, T. W. Kwon, I. Lee, T. S. Kim, A. Coskun and J. W. Choi, *Energ Environ Sci*, 2015, **8**, 1224-1230.
9. T. W. Kwon, Y. K. Jeong, E. Deniz, S. Y. AlQaradawi, J. W. Choi and A. Coskun, *Acs Nano*, 2015, **9**, 11317-11324.
